# Supplementary material for: Genetic and Pathogenic Variability of Mycogone perniciosa Isolates Causing Wet Bubble Disease on Agaricus bisporus in China
Source: PubMed Central journal article supplement (PMC6963780; doi:10.3390/pathogens8040179), 2019-10-08
Supplement: pathogens-08-00179-s001.pdf [file pathogens-08-00179-s001.pdf]

Supplementary Table 1: Conidia production (conidia per mL) of 18 isolates of *Mycogone pernicioso* growing on PDA medium at 25°C for 7 days.

| No | Isolates | Concentration of conidia production<br>Conidia/ mL<br>(10 <sup>6</sup> ) |
|----|----------|--------------------------------------------------------------------------|
| 1  | Hp1      | 0.003 ±0.001 <sup>a</sup>                                                |
| 2  | Hp2      | 0.000                                                                    |
| 3  | Hp3      | 0.002 ±0.001 <sup>a</sup>                                                |
| 4  | Hp4      | 0.006 ±0.002 <sup>a</sup>                                                |
| 5  | Hp5      | 0.067 ±0.029 <sup>a</sup>                                                |
| 6  | Hp6      | 0.233 ±0.029 <sup>a</sup>                                                |
| 7  | Hp7      | 0.467 ±0.029 <sup>a</sup>                                                |
| 8  | Hp8      | 0.000                                                                    |
| 9  | Hp9      | 0.037 ±0.046 <sup>ab</sup>                                               |
| 10 | Hp10     | 0.517 ±0.076 <sup>a</sup>                                                |
| 11 | Hp11     | 0.317 ±0.029 <sup>a</sup>                                                |
| 12 | Hp12     | 0.283 ±0.029 <sup>a</sup>                                                |
| 13 | Hp13     | 0.02 ±0.003 <sup>a</sup>                                                 |
| 14 | Hp14     | 0.03 ±0.004 <sup>a</sup>                                                 |
| 15 | Hp15     | 0.067 ±0.029 <sup>a</sup>                                                |
| 16 | Hp16     | 0.067 ±0.058 <sup>a</sup>                                                |
| 17 | Hp17     | 0.10 ±0.050 <sup>a</sup>                                                 |
| 18 | Hp18     | 0.60 ±0.180 <sup>a</sup>                                                 |

Results followed by the same letter in the column do not differ significantly (Duncan's Multiple Range Test, P < 0.05). \*P = 0.0001
